# Supplementary material for: COVID-19 Vaccination Acceptance and Hesitancy among Healthcare Workers in Germany
Source: MDPI journal article supplement (doi:10.3390/vaccines9070777), 2021-07-12
Supplement: s1 [file s1]

## Supplemental Material

Supplemental Table S1: Overview on studies identifying vaccination acceptance in medical professionals.

| Publication                                 | Country                          | Participants total | Subgroups          | Acceptance (% of participants) | Hurdles / Barriers                                                                                                                                               | Peer-reviewed | Survey conducted |
|---------------------------------------------|----------------------------------|--------------------|--------------------|--------------------------------|------------------------------------------------------------------------------------------------------------------------------------------------------------------|---------------|------------------|
| Holzmann-Littig et al. (present manuscript) | Germany                          | 4500               | HCW                | 91.7%                          | development velocity, lack of trust in authorities, personal surrounding against vaccination, lack of information, generally not keeping vaccinations up to date | yes           | Feb 21           |
| Wang et al. [11]                            | Hong Kong                        | 806                | Nurses             | 40.3%                          | "suspicion on efficacy, effectiveness and safety", "believing it unnecessary", and "no time to take it"                                                          | yes           | Feb / Mar 20     |
| Kwok et al. [12]                            | Hong Kong                        | 1205               | Nurses             | 63.0%                          | 5 C                                                                                                                                                              | yes           | Mar / Apr 20     |
| Dror et al. [13]                            | Israel                           | 211                | Nurses             | 61.1%                          | No care of COVID-19 patients                                                                                                                                     | yes           | Mar / Apr 20     |
| Gagneux-Brunon [14]                         | France                           | 1554               | HCW                | 76.9%                          | vaccine hesitancy                                                                                                                                                | yes           | Mar-Jul 20       |
| COSMO [9, 15]                               | Germany                          | 127                | n.a.               | ~64 %                          | Knowledge / information, trust                                                                                                                                   | no            | Dec 20           |
| Karagiannidis et al. [16]                   | Germany                          | 2305               | Physicians, Nurses | 64%                            |                                                                                                                                                                  | yes           | Dec 20           |
| DIVI/DGIIN [17]                             | Germany                          | 3501               | Physicians, Nurses | 75%                            |                                                                                                                                                                  | no            | Feb 21           |
| American Nurses Foundation [18]             | USA                              | 12939              | Nurses             | 34.0%                          | Development to quick, not enough information, unclear clinical trials process                                                                                    | no            | Oct 20           |
| Revive Health [19]                          | USA                              | 370                | Physicians, Nurses | 31.0%                          | Safety, efficacy, compromised development process                                                                                                                | no            | Oct / Nov 20     |
| Di Gennaro et al [20]                       | Italy                            | 1723               | HCW                | 67%                            | Lack of trust in vaccine safety, little / conflicting information                                                                                                | yes           | Oct/Nov 20       |
| Verger et al. [21]                          | France, Belgium, Quebec (Canada) | 2678               | HCW                | 71.6%                          | Vaccine safety concerns                                                                                                                                          | yes           | Oct / Nov 20     |
| Papagiannis et al. [22]                     | Greece                           | 340                | HCW                | 78.5%                          | fear of adverse effects, shortness of vaccine development time                                                                                                   | yes           | Dec 20           |
| Meyer et al. [23]                           | Pennsylvania, USA                | 16158              | HCW                | 55.0%                          | Unknown risks, insufficient data, adverse effects, wanting to wait to see how it goes with others                                                                | Preprint      | Dec 20           |
| Dzieciolowska et al. [26]                   | Canada                           | 2761               | HCW                | 80.9%                          | Vaccine novelty, wanting others to receive it first, insufficient time for decision making                                                                       | yes           | Dec 20           |
| Nohl et al. [25]                            | Germany                          | 1296               | EMS staff          | 57.0%                          | Female gender, lower education level, younger age, less firsthand experience with disease burden                                                                 | yes           | Dec 20-Jan 21    |
| Schrading et al. [24]                       | USA                              | 1398               | HCW                | 86.0%                          | Safety concerns                                                                                                                                                  | yes           | Jan 21           |
| Aloweidi et al. [27]                        | Jordan                           | 646                | HCW / non-HCW      | 45.6 (HCW)                     | Safety concerns, trust                                                                                                                                           | yes           | Jan 21-Feb 21    |

Abbreviations: GP, general practitioner; DIVI, Deutsche Interdisziplinäre Vereinigung für Intensiv- und Notfallmedizin; DGIIN, Deutsche Gesellschaft für Internistische Intensivmedizin und Notfallmedizin; HCW, health care worker; n.a., not applicable; EMS: emergency medical services. The search strategy included these main components: 'vaccine hesitancy', 'health care workers' and "Covid-19". "Health care workers" was substituted with "health care professionals" in another search. We searched: Pubmed, medRxiv.org for preprints, Web of Science and Google Scholar to find relevant studies published to March 2021. We included studies published in the English and German language. Google Search was used to identify press releases of ongoing and unpublished studies. These were only included if they were either published in a peer-reviewed journal or preprint. From the identified publications and preprints we checked whether studies on the same topic that were cited in these publications had been included in our overview of studies already. The table is intended to provide an overview without claiming to be fully comprehensive. Additional studies have been added in May 2021.

Supplemental Table S2: Invitations and responses from German regions and federal states

| Federal state                       | Number of e-mail invitations (% of total) | Number of responses in the final dataset (% of total) | Number of inhabitants 31 <sup>st</sup> , 2019 [Millions], (% of total) |
|-------------------------------------|-------------------------------------------|-------------------------------------------------------|------------------------------------------------------------------------|
| <b>Northern Germany</b>             |                                           |                                                       |                                                                        |
| Schleswig-Holstein                  | 183 (4.7)                                 | 516 (11.5)                                            | 2.904 (3.5)                                                            |
| Mecklenburg-Western Pomerania       | 174 (4.4)                                 | 34 (0.8)                                              | 1.608 (1.9)                                                            |
| Hamburg                             | 171 (4.3)                                 | 94 (2.1)                                              | 1.847 (2.2)                                                            |
| Lower Saxony                        | 227 (5.8)                                 | 593 (13.2)                                            | 7.994 (9.6)                                                            |
| Bremen                              | 152 (3.9)                                 | 29 (0.6)                                              | 0.681 (0.8)                                                            |
| Total Northern Germany              | 907 (23.1)                                | 1266 (28.1)                                           | 15.034 (18.1)                                                          |
| <b>Eastern Germany</b>              |                                           |                                                       |                                                                        |
| Brandenburg                         | 195 (5.0)                                 | 81 (1.8)                                              | 2.522 (3.0)                                                            |
| Berlin                              | 196 (5.0)                                 | 110 (2.4)                                             | 3.669 (4.4)                                                            |
| Saxony-Anhalt                       | 174 (4.4)                                 | 61 (1.4)                                              | 2.195 (2.6)                                                            |
| Saxony                              | 212 (5.4)                                 | 81 (1.8)                                              | 4.072 (4.9)                                                            |
| Thuringia                           | 167 (4.3)                                 | 47 (1.0)                                              | 2.133 (2.6)                                                            |
| Total Eastern Germany               | 944 (24.1)                                | 380 (8.4)                                             | 14.591 (17.5)                                                          |
| <b>Western Germany</b>              |                                           |                                                       |                                                                        |
| North Rhine-Westphalia              | 292 (7.4)                                 | 643 (14.3)                                            | 17.947 (21.6)                                                          |
| Hesse                               | 229 (5.8)                                 | 400 (8.9)                                             | 6.288 (7.6)                                                            |
| Rhineland-Palatinate                | 223 (5.7)                                 | 94 (2.1)                                              | 4.094 (4.9)                                                            |
| Saarland                            | 150 (3.8)                                 | 31 (0.7)                                              | 0.987 (1.2)                                                            |
| Total Western Germany               | 894 (22.8)                                | 1168 (26.0)                                           | 29.316 (35.2)                                                          |
| <b>Southern Germany</b>             |                                           |                                                       |                                                                        |
| Bavaria                             | 375 (9.6)                                 | 1380 (30.7)                                           | 13.125 (15.8)                                                          |
| Baden-Wuerttemberg                  | 704 (17.9)                                | 202 (4.5)                                             | 11.100 (13.3)                                                          |
| Total Southern Germany              | 1079 (27.5)                               | 1582 (35.2)                                           | 24.225 (29.1)                                                          |
| <b>Nationwide</b>                   |                                           |                                                       |                                                                        |
| Non region related organizations:   | 100                                       |                                                       |                                                                        |
| Germany total                       | 3924                                      |                                                       | 83.166                                                                 |
| No answer to federal state question |                                           | 104 (2.3)                                             |                                                                        |
| Datasets used                       |                                           | 4500                                                  |                                                                        |

**Supplemental Table S3.** Original questions of the survey, translated from German.

**Section 1: Basic data / demographics**

**Sex**

female / male / no answer

**Age**

≤20 years / 21-30 years / 31 - 40 years / 41 - 50 years / 51 - 60 years / ≥61 years / no answer

**Profession**

Certified nurse / Non-examined nurse / Medical specialist (Medical technical assistants, surgical assistant etc.) / Resident physician / specialized physician / Consultant physician / Chief physician / administrative staff / Non-physician staff in the rescue service / Trainee / student of human medicine / Student of dentistry / other – Free text / no answer

**Work Setting**

Maximum-care hospital; university hospital / Hospitals of other care levels  
Medical practice; Medical care center / Rescue service / nursing home; retirement home / Outpatient nursing service / other – free text / no answer

**You indicated that you work in an inpatient setting. Do you work in an intensive care unit in this setting? If work setting 1 or 2 have been selected.**

yes / no

**I work with COVID-19 positive patients**

Never / under 50% of my working days / over 50% of my working days (but not every working day) / on each of my working days / no answer

**I work in the following federal district:**

Bavaria / Baden-Wuerttemberg / Berlin / Brandenburg / Bremen / Hamburg / Hesse / Mecklenburg-Western Pomerania / Lower Saxony / North Rhine-Westphalia / Rhineland-Palatinate / Saarland / Saxony / Saxony-Anhalt / Schleswig-Holstein / Thuringia / no answer

**Section 2: Vaccinations in general**

**Please rate the following statements about vaccinations in general:**

**I make sure to keep my vaccinations up to date.**

I do not agree at all / I rather do not agree / I neither agree nor disagree / I rather agree / I fully agree / no answer

**I receive flu (influenza) vaccinations regularly.**

I do not agree at all / I rather do not agree / I neither agree nor disagree / I rather agree / I fully agree / no answer

**I feel well informed about vaccines in general.**

I do not agree at all / I rather do not agree / I neither agree nor disagree / I rather agree / I fully agree / no answer

**I am generally afraid of adverse effects of vaccinations.**

I do not agree at all / I rather do not agree / I neither agree nor disagree / I rather agree / I fully agree / no answer

**I think vaccinations are generally effective.**

I do not agree at all / I rather do not agree / I neither agree nor disagree / I rather agree / I fully agree / no answer

**I trust vaccines in general.**

I do not agree at all / I rather do not agree / I neither agree nor disagree / I rather agree / I fully agree / no answer

**I believe that the pharmaceutical industry puts profit motives over the safety of vaccines.**

I do not agree at all / I rather do not agree / I neither agree nor disagree / I rather agree / I fully agree / no answer

**I trust the regulatory authorities of vaccines in Germany in general.**

I do not agree at all / I rather do not agree / I neither agree nor disagree / I rather agree / I fully agree / no answer

**I already had a serious vaccine adverse effect that required medical treatment.**

yes / no / no answer, if yes -> free text

### **Section 3 Vaccinations against COVID-19**

**I have already received one or two vaccinations against COVID-19 or already have a vaccination appointment.**

yes / no / no answer

**In my personal environment (family, friends, colleagues) there are people who have already received one (or two) vaccinations.**

yes / no / I do not know / no answer

**I want to get vaccinated against COVID-19. (Questions opens only if participant indicates not to have been vaccinated yet / if participant clicked “no answer”.)**

yes / no / undecided / no answer

**I do not want to get vaccinated until I see that a lot of people who have been vaccinated have tolerated it. (Question only opens, if “undecided” or “no answer” have been indicated.)**

I do not agree at all / I rather do not agree / I neither agree nor disagree / I rather agree / I fully agree / no answer

**In my personal environment (family, friends, colleagues) there were people suffering from COVID-19.**

yes / no / I do not know / no answer

**You have indicated that there were COVID-19 patients in your personal environment. Please answer the following questions: (Question only opens, if “yes” has been indicated.)**

**One / more persons of the above have been hospitalized in connection with COVID-19 disease**

yes / no / I do not know / no answer

**One / more persons of the above have been in an intensive care unit in connection with the COVID-19 disease**

yes / no / I do not know / no answer

**One / more persons of the above have died in connection with COVID-19 disease**

yes / no / I do not know / no answer

**In my personal environment (family, friends, colleagues) there are people for whom a COVID-19 disease would probably be severe.**

yes / no / I do not know / no answer

**Please answer the following questions on COVID-19 / vaccinations against COVID-19:**

**In case of COVID-19 disease, I fear a severe course of the disease for myself**

I do not agree at all / I rather do not agree / I neither agree nor disagree / I rather agree / I fully agree / no answer

**I am afraid of getting infected with COVID-19 in my professional environment.**

I do not agree at all / I rather do not agree / I neither agree nor disagree / I rather agree / I fully agree / no answer

**I am afraid of becoming infected with COVID-19 in a private environment.**

I do not agree at all / I rather do not agree / I neither agree nor disagree / I rather agree / I fully agree / no answer

**I feel well informed about COVID-19 vaccines.**

I do not agree at all / I rather do not agree / I neither agree nor disagree / I rather agree / I fully agree / no answer

**I am afraid of short-term adverse effects of COVID-19 vaccines.**

I do not agree at all / I rather do not agree / I neither agree nor disagree / I rather agree / I fully agree / no answer

**I am afraid of long-term adverse effects from COVID-19 vaccines.**

I do not agree at all / I rather do not agree / I neither agree nor disagree / I rather agree / I fully agree / no answer

**I believe the COVID-19 vaccines are effective.**

I do not agree at all / I rather do not agree / I neither agree nor disagree / I rather agree / I fully agree / no answer

**I am concerned about what I consider novel mechanisms of action in COVID-19 vaccines.**

I do not agree at all / I rather do not agree / I neither agree nor disagree / I rather agree / I fully agree / no answer

**The development and approval of COVID-19 vaccines are moving too fast for me.**

I do not agree at all / I rather do not agree / I neither agree nor disagree / I rather agree / I fully agree / no answer

**I generally trust the COVID-19 vaccines.**

I do not agree at all / I rather do not agree / I neither agree nor disagree / I rather agree / I fully agree / no answer

**I believe the pharmaceutical industry cares more about its profit motives than safety of COVID-19 vaccines.**

I do not agree at all / I rather do not agree / I neither agree nor disagree / I rather agree / I fully agree / no answer

**I trust the European regulatory authorities of COVID-19 vaccines used in Germany.**

I do not agree at all / I rather do not agree / I neither agree nor disagree / I rather agree / I fully agree / no answer

**I generally trust in the German health care politics.**

I do not agree at all / I rather do not agree / I neither agree nor disagree / I rather agree / I fully agree / no answer

**I generally trust in the medical opinion of physicians.**

I do not agree at all / I rather do not agree / I neither agree nor disagree / I rather agree / I fully agree / no answer

**I favor an introduction of compulsory vaccination for health care professionals.**

I do not agree at all / I rather do not agree / I neither agree nor disagree / I rather agree / I fully agree / no answer

**In case of approval by the European and German authorities, I would also be vaccinated with a vaccine not developed in America or Europe.**

I do not agree at all / I rather do not agree / I neither agree nor disagree / I rather agree / I fully agree / no answer

**If you are concerned about short-term adverse effects, what are they?**

Free text

**If you are concerned about long-term adverse effects, what are they?**

Free text

**Knowledge**

**Which of the statements about COVID-19 vaccines do you think are correct?**

**m-RNA vaccines stimulate the formation of protein structures that mimic parts of the viral envelope.**

true / false / I do not know / no answer

**m-RNA vaccines alter the genetic material**

true / false / I do not know / no answer

**COVID-19 vaccination can cause me to shed infectious viruses**

true / false / I do not know / no answer

**m-RNA is rapidly degraded in the body**

true / false / I do not know / no answer

**My primary care physician has given me ...**

advise to get vaccinated against COVID-19 / advise not to get vaccinated COVID-19 / We have not discussed the vaccination so far. / We have addressed the vaccination; my primary care physician has not made a recommendation for or against the vaccination. / no answer

**The majority of my colleagues have / would like to**

get vaccinated against COVID-19 / not get vaccinated against COVID-19 / not yet decided whether to get vaccinated / we have not discussed vaccination so far / answer

**The majority of my family / friends have or would like to**

get vaccinated against COVID-19 / not get vaccinated against COVID-19 / not yet decided whether to get vaccinated / we have not discussed vaccination so far / no answer

**I have given the majority of my patients (without contraindication) ...**

advise to get vaccinated against COVID-19 / advise not to get vaccinated COVID-19 / We have not discussed the vaccination so far / We have addressed the vaccination; I have not made a recommendation for or against the vaccination / no answer

**I have given my family / friends**

advise to get vaccinated against COVID-19 / advise not to get vaccinated COVID-19 / We have not discussed the vaccination so far / We have addressed the vaccination; I have not made a recommendation for or against the vaccination / no answer

**Because of the COVID-19 pandemic, I, or my family, have suffered economic losses.**

yes / no / I do not know / no answer

**From what media do you get your information on COVID-19 vaccination?**

Daily newspapers, weekly magazines (print) / Daily newspapers, weekly magazines (online) / Scientific journals (print) / Scientific journals (online) / Television / radio / social networks (e.g., Facebook) / messenger services (e.g., Twitter, Telegram) / Online video platforms (e.g., YouTube) / Websites / information portals of government health authorities (e.g., RKI, WHO) / Other -> Free text

Supplemental Table S4: Appliance of the CHERRIES checklist, table adapted from the Cherries checklist (29)

| Item Category                                                                               | Reported in materials / methods |
|---------------------------------------------------------------------------------------------|---------------------------------|
| <b>Design</b>                                                                               |                                 |
| Describe survey design                                                                      | √                               |
| <b>IRB (Institutional Review Board) approval and informed consent process</b>               |                                 |
| IRB approval                                                                                | √                               |
| Informed consent                                                                            | √                               |
| Data protection                                                                             | √                               |
| <b>Development and pre-testing</b>                                                          |                                 |
| Development and testing                                                                     | √                               |
| <b>Recruitment process and description of the sample having access to the questionnaire</b> |                                 |
| Open survey versus closed survey                                                            | √                               |
| Contact mode                                                                                | √                               |
| Advertising the survey                                                                      | √                               |
| <b>Survey administration</b>                                                                |                                 |
| Web/E-mail                                                                                  | √                               |
| Context                                                                                     | √                               |
| Mandatory/voluntary                                                                         | √                               |
| Incentives                                                                                  | √                               |
| Time/Date                                                                                   | √                               |
| Randomization of items or questionnaires                                                    | √                               |
| Adaptive questioning                                                                        | √                               |
| Number of Items                                                                             | √                               |
| Number of screens (pages)                                                                   | √                               |
| Completeness check                                                                          | √                               |
| Review step                                                                                 | √                               |
| <b>Response rates</b>                                                                       |                                 |
| Unique site visitor                                                                         | n/a                             |
| View rate (Ratio of unique survey visitors/unique site visitors)                            | n/a                             |
| Participation rate (Ratio of unique visitors who agreed to participate/unique first         | n/a                             |
| Completion rate (Ratio of users who finished the survey/users who agreed to                 | √                               |
| <b>Preventing multiple entries from the same individual</b>                                 |                                 |
| Cookies used                                                                                | √                               |
| IP check                                                                                    | √                               |
| Log file analysis                                                                           | √                               |

| Item Category                                       | Reported<br>in materials /<br>methods |
|-----------------------------------------------------|---------------------------------------|
| Registration                                        | √                                     |
| <b>Analysis</b>                                     |                                       |
| Handling of incomplete questionnaires               | √                                     |
| Questionnaires submitted with an atypical timestamp | √                                     |
| Statistical correction                              | √                                     |



Supplemental Table S5: overall results.

|                                                          | Want to<br>get<br>vaccinated<br>or already<br>vaccinated<br>(N=4125) | %     | Undecided<br>(N=167) | %   | Do not<br>want to<br>get<br>vaccinated<br>(N=208) | %    | Total<br>(N=4500) | %     |
|----------------------------------------------------------|----------------------------------------------------------------------|-------|----------------------|-----|---------------------------------------------------|------|-------------------|-------|
| <b>Sex</b>                                               |                                                                      |       |                      |     |                                                   |      |                   |       |
| Female                                                   | 2392                                                                 | 91.6  | 115                  | 4.4 | 103                                               | 3.9  | 2610              | 100.0 |
| Male                                                     | 1726                                                                 | 91.9  | 51                   | 2.7 | 102                                               | 5.4  | 1879              | 100.0 |
| Missing / no answer                                      |                                                                      |       |                      |     |                                                   |      | 11                |       |
| <b>Age</b>                                               |                                                                      |       |                      |     |                                                   |      |                   |       |
| ≤20 years                                                | 134                                                                  | 85.9  | 8                    | 5.1 | 14                                                | 9.0  | 156               | 100.0 |
| 21-30 years                                              | 1491                                                                 | 93.0  | 51                   | 3.2 | 61                                                | 3.8  | 1603              | 100.0 |
| 31-40 years                                              | 794                                                                  | 91.1  | 39                   | 4.5 | 39                                                | 4.5  | 872               | 100.0 |
| 41-50 years                                              | 664                                                                  | 91.0  | 30                   | 4.1 | 36                                                | 4.9  | 730               | 100.0 |
| 51-60 years                                              | 714                                                                  | 92.0  | 29                   | 3.7 | 33                                                | 4.3  | 776               | 100.0 |
| ≥61 years                                                | 325                                                                  | 91.5  | 8                    | 2.3 | 22                                                | 6.2  | 355               | 100.0 |
| Missing / no answer                                      |                                                                      |       |                      |     |                                                   |      | 8                 |       |
| <b>Profession</b>                                        |                                                                      |       |                      |     |                                                   |      |                   |       |
| Certified nurse                                          | 424                                                                  | 91.0  | 18                   | 3.9 | 24                                                | 5.2  | 466               | 100.0 |
| Other non-physician medical staff                        | 311                                                                  | 89.9  | 17                   | 4.9 | 18                                                | 5.2  | 346               | 100.0 |
| Resident                                                 | 302                                                                  | 93.5  | 9                    | 2.8 | 12                                                | 3.7  | 323               | 100.0 |
| Physician with specialist / personnel responsibility     | 1225                                                                 | 92.2  | 42                   | 3.2 | 62                                                | 4.7  | 1329              | 100.0 |
| Administration / science                                 | 241                                                                  | 90.6  | 16                   | 6.0 | 9                                                 | 3.4  | 266               | 100.0 |
| Medical student                                          | 1225                                                                 | 93.3  | 37                   | 2.8 | 51                                                | 3.9  | 1313              | 100.0 |
| Dentist / dentistry student / dental assisting personnel | 241                                                                  | 83.7  | 21                   | 7.3 | 26                                                | 9.0  | 288               | 100.0 |
| Other non-physician medical staff                        | 143                                                                  | 96.6  | 3                    | 2.0 | 2                                                 | 1.4  | 148               | 100.0 |
| Missing / no answer                                      |                                                                      |       |                      |     |                                                   |      | 21                |       |
| <b>Work setting</b>                                      |                                                                      |       |                      |     |                                                   |      |                   |       |
| Maximum-care hospital / university hospital              | 1807                                                                 | 94.4  | 55                   | 2.9 | 53                                                | 2.8  | 1915              | 100.0 |
| Hospital of other care levels                            | 758                                                                  | 93.8  | 23                   | 2.8 | 27                                                | 3.3  | 808               | 100.0 |
| Medical practice / medical care center                   | 781                                                                  | 86.0  | 49                   | 5.4 | 78                                                | 8.6  | 908               | 100.0 |
| Rescue service                                           | 126                                                                  | 96.2  | 3                    | 2.3 | 2                                                 | 1.5  | 131               | 100.0 |
| Nursing home / retirement home                           | 27                                                                   | 100.0 | 0                    | 0.0 | 0                                                 | 0.0  | 27                | 100.0 |
| Outpatient nursing service                               | 35                                                                   | 77.8  | 3                    | 6.7 | 7                                                 | 15.6 | 45                | 100.0 |
| Other non-physician medical staff                        | 263                                                                  | 93.6  | 10                   | 3.6 | 8                                                 | 2.8  | 281               | 100.0 |

|                                                                                                                    |      |      |    |      |     |      |      |       |  |
|--------------------------------------------------------------------------------------------------------------------|------|------|----|------|-----|------|------|-------|--|
| Missing / no answer                                                                                                |      |      |    |      |     |      |      | 385   |  |
| <b>You indicated that you work in an inpatient setting. Do you work in an intensive care unit in this setting?</b> |      |      |    |      |     |      |      |       |  |
| Yes                                                                                                                | 1053 | 95.3 | 20 | 1.8  | 32  | 2.9  | 1105 | 100.0 |  |
| No                                                                                                                 | 1428 | 93.6 | 55 | 3.6  | 42  | 2.8  | 1525 | 100.0 |  |
| Missing / no answer                                                                                                |      |      |    |      |     |      |      | 1870  |  |
| <b>I work with COVID-19 positive patients</b>                                                                      |      |      |    |      |     |      |      |       |  |
| Never                                                                                                              | 1559 | 90.2 | 80 | 4.6  | 90  | 5.2  | 1729 | 100.0 |  |
| < 50% of working days                                                                                              | 1703 | 93.8 | 46 | 2.5  | 66  | 3.6  | 1815 | 100.0 |  |
| > 50% of working days (but not every working day)                                                                  | 287  | 93.5 | 7  | 2.3  | 13  | 4.2  | 307  | 100.0 |  |
| On each working day                                                                                                | 161  | 94.2 | 2  | 1.2  | 8   | 4.7  | 171  | 100.0 |  |
| Missing / no answer                                                                                                |      |      |    |      |     |      |      | 478   |  |
| <b>Region</b>                                                                                                      |      |      |    |      |     |      |      |       |  |
| Southern Germany                                                                                                   | 1475 | 93.2 | 52 | 3.3  | 55  | 3.5  | 1582 | 100.0 |  |
| Eastern Germany                                                                                                    | 344  | 90.5 | 15 | 3.9  | 21  | 5.5  | 380  | 100.0 |  |
| Northern Germany                                                                                                   | 1132 | 89.4 | 57 | 4.5  | 77  | 6.1  | 1266 | 100.0 |  |
| Western Germany                                                                                                    | 1083 | 92.7 | 37 | 3.2  | 48  | 4.1  | 1168 | 100.0 |  |
| Missing / no answer                                                                                                |      |      |    |      |     |      |      | 104   |  |
| <b>I make sure to keep my vaccinations up to date.</b>                                                             |      |      |    |      |     |      |      |       |  |
| Totally disagree                                                                                                   | 14   | 29.2 | 4  | 8.3  | 30  | 62.5 | 48   | 100.0 |  |
| Rather disagree                                                                                                    | 113  | 73.9 | 8  | 5.2  | 32  | 20.9 | 153  | 100.0 |  |
| Neither agree nor disagree                                                                                         | 107  | 81.1 | 11 | 8.3  | 14  | 10.6 | 132  | 100.0 |  |
| Rather agree                                                                                                       | 1043 | 89.4 | 69 | 5.9  | 55  | 4.7  | 1167 | 100.0 |  |
| Totally agree                                                                                                      | 2838 | 95.1 | 73 | 2.4  | 72  | 2.4  | 2983 | 100.0 |  |
| Missing / no answer                                                                                                |      |      |    |      |     |      |      | 17    |  |
| <b>I receive flu (influenza) vaccinations regularly</b>                                                            |      |      |    |      |     |      |      |       |  |
| Totally disagree                                                                                                   | 722  | 75.8 | 85 | 8.9  | 146 | 15.3 | 953  | 100.0 |  |
| Rather disagree                                                                                                    | 466  | 91.4 | 31 | 6.1  | 13  | 2.5  | 510  | 100.0 |  |
| Neither agree nor disagree                                                                                         | 271  | 92.5 | 9  | 3.1  | 13  | 4.4  | 293  | 100.0 |  |
| Rather agree                                                                                                       | 758  | 95.9 | 19 | 2.4  | 13  | 1.6  | 790  | 100.0 |  |
| Totally agree                                                                                                      | 1878 | 97.7 | 23 | 1.2  | 22  | 1.1  | 1923 | 100.0 |  |
| Missing / no answer                                                                                                |      |      |    |      |     |      |      | 31    |  |
| <b>I feel well informed about vaccines in general.</b>                                                             |      |      |    |      |     |      |      |       |  |
| Totally disagree                                                                                                   | 30   | 52.6 | 8  | 14.0 | 19  | 33.3 | 57   | 100.0 |  |
| Rather disagree                                                                                                    | 150  | 72.1 | 24 | 11.5 | 34  | 16.3 | 208  | 100.0 |  |
| Neither agree nor disagree                                                                                         | 331  | 82.3 | 43 | 10.7 | 28  | 7.0  | 402  | 100.0 |  |
| Rather agree                                                                                                       | 1576 | 92.9 | 64 | 3.8  | 56  | 3.3  | 1696 | 100.0 |  |
| Totally agree                                                                                                      | 2029 | 95.3 | 28 | 1.3  | 71  | 3.3  | 2128 | 100.0 |  |
| Missing / no answer                                                                                                |      |      |    |      |     |      |      | 9     |  |
| <b>I am generally afraid of adverse effects of vaccinations.</b>                                                   |      |      |    |      |     |      |      |       |  |
| Totally disagree                                                                                                   | 1851 | 96.3 | 28 | 1.5  | 43  | 2.2  | 1922 | 100.0 |  |
| Rather disagree                                                                                                    | 1678 | 94.1 | 56 | 3.1  | 49  | 2.7  | 1783 | 100.0 |  |

|                                                                                                                                       |      |      |     |      |     |      |      |       |
|---------------------------------------------------------------------------------------------------------------------------------------|------|------|-----|------|-----|------|------|-------|
| Neither agree nor disagree                                                                                                            | 254  | 79.9 | 29  | 9.1  | 35  | 11.0 | 318  | 100.0 |
| Rather agree                                                                                                                          | 241  | 76.5 | 39  | 12.4 | 35  | 11.1 | 315  | 100.0 |
| Totally agree                                                                                                                         | 95   | 61.7 | 15  | 9.7  | 44  | 28.6 | 154  | 100.0 |
| Missing / no answer                                                                                                                   |      |      |     |      |     |      | 8    |       |
| <b>I think vaccinations are generally effective.</b>                                                                                  |      |      |     |      |     |      |      |       |
| Totally disagree                                                                                                                      | 30   | 66.7 | 1   | 2.2  | 14  | 31.1 | 45   | 100.0 |
| Rather disagree                                                                                                                       | 13   | 28.3 | 5   | 10.9 | 28  | 60.9 | 46   | 100.0 |
| Neither agree nor disagree                                                                                                            | 29   | 39.2 | 8   | 10.8 | 37  | 50.0 | 74   | 100.0 |
| Rather agree                                                                                                                          | 456  | 79.6 | 66  | 11.5 | 51  | 8.9  | 573  | 100.0 |
| Totally agree                                                                                                                         | 3594 | 95.7 | 87  | 2.3  | 76  | 2.0  | 3757 | 100.0 |
| Missing / no answer                                                                                                                   |      |      |     |      |     |      | 5    |       |
| <b>I trust vaccines in general.</b>                                                                                                   |      |      |     |      |     |      |      |       |
| Totally disagree                                                                                                                      | 18   | 31.0 | 0   | 0.0  | 40  | 69.0 | 58   | 100.0 |
| Rather disagree                                                                                                                       | 30   | 37.0 | 15  | 18.5 | 36  | 44.4 | 81   | 100.0 |
| Neither agree nor disagree                                                                                                            | 97   | 62.2 | 27  | 17.3 | 32  | 20.5 | 156  | 100.0 |
| Rather agree                                                                                                                          | 1038 | 88.2 | 80  | 6.8  | 59  | 5.0  | 1177 | 100.0 |
| Totally agree                                                                                                                         | 2937 | 97.2 | 45  | 1.5  | 40  | 1.3  | 3022 | 100.0 |
| Missing / no answer                                                                                                                   |      |      |     |      |     |      | 6    |       |
| <b>I believe that the pharmaceutical industry puts profit motives over safety of vaccines.</b>                                        |      |      |     |      |     |      |      |       |
| Totally disagree                                                                                                                      | 914  | 96.9 | 12  | 1.3  | 17  | 1.8  | 943  | 100.0 |
| Rather disagree                                                                                                                       | 1721 | 97.2 | 33  | 1.9  | 16  | 0.9  | 1770 | 100.0 |
| Neither agree nor disagree                                                                                                            | 976  | 91.2 | 53  | 5.0  | 41  | 3.8  | 1070 | 100.0 |
| Rather agree                                                                                                                          | 369  | 79.2 | 44  | 9.4  | 53  | 11.4 | 466  | 100.0 |
| Totally agree                                                                                                                         | 97   | 49.2 | 21  | 10.7 | 79  | 40.1 | 197  | 100.0 |
| Missing / no answer                                                                                                                   |      |      |     |      |     |      | 54   |       |
| <b>I trust the regulatory authorities of vaccines in Germany in general.</b>                                                          |      |      |     |      |     |      |      |       |
| Totally disagree                                                                                                                      | 34   | 43.6 | 5   | 6.4  | 39  | 50.0 | 78   | 100.0 |
| Rather disagree                                                                                                                       | 49   | 40.8 | 12  | 10.0 | 59  | 49.2 | 120  | 100.0 |
| Neither agree nor disagree                                                                                                            | 161  | 64.9 | 41  | 16.5 | 46  | 18.5 | 248  | 100.0 |
| Rather agree                                                                                                                          | 1513 | 91.3 | 94  | 5.7  | 51  | 3.1  | 1658 | 100.0 |
| Totally agree                                                                                                                         | 2356 | 98.9 | 15  | 0.6  | 12  | 0.5  | 2383 | 100.0 |
| Missing / no answer                                                                                                                   |      |      |     |      |     |      | 13   |       |
| <b>I already had a serious vaccine adverse effect that required medical treatment.</b>                                                |      |      |     |      |     |      |      |       |
| Yes                                                                                                                                   | 106  | 77.9 | 11  | 8.1  | 19  | 14.0 | 136  | 100.0 |
| No                                                                                                                                    | 3998 | 92.5 | 151 | 3.5  | 174 | 4.0  | 4323 | 100.0 |
| Missing / no answer                                                                                                                   |      |      |     |      |     |      | 41   |       |
| <b>In my personal environment (family, friends, colleagues) there are people who have already received one (or two) vaccinations.</b> |      |      |     |      |     |      |      |       |
| Yes                                                                                                                                   | 3278 | 93.8 | 104 | 3.0  | 113 | 3.2  | 3495 | 100.0 |
| No                                                                                                                                    | 801  | 84.5 | 58  | 6.1  | 89  | 9.4  | 948  | 100.0 |
| I do not know                                                                                                                         | 45   | 80.4 | 5   | 8.9  | 6   | 10.7 | 56   | 100.0 |
| Missing / no answer                                                                                                                   |      |      |     |      |     |      | 1    |       |
| <b>In my personal environment (family, friends, colleagues) there were people suffering from COVID-19.</b>                            |      |      |     |      |     |      |      |       |
| Yes                                                                                                                                   | 2929 | 92.1 | 119 | 3.7  | 132 | 4.2  | 3180 | 100.0 |
| No                                                                                                                                    | 1117 | 90.9 | 43  | 3.5  | 69  | 5.6  | 1229 | 100.0 |
| I do not know                                                                                                                         | 77   | 86.5 | 5   | 5.6  | 7   | 7.9  | 89   | 100.0 |
| Missing / no answer                                                                                                                   |      |      |     |      |     |      | 2    |       |

|                                                                                                                                       |      |      |     |      |     |      |      |       |
|---------------------------------------------------------------------------------------------------------------------------------------|------|------|-----|------|-----|------|------|-------|
| <b>One / more persons of the above have been hospitalized in connection with COVID-19 disease</b>                                     |      |      |     |      |     |      |      |       |
| Yes                                                                                                                                   | 1029 | 92.8 | 39  | 3.5  | 41  | 3.7  | 1109 | 100.0 |
| No                                                                                                                                    | 2933 | 91.3 | 120 | 3.7  | 159 | 5.0  | 3212 | 100.0 |
| I do not know                                                                                                                         | 78   | 95.1 | 3   | 3.7  | 1   | 1.2  | 82   | 100.0 |
| Missing / no answer                                                                                                                   |      |      |     |      |     |      | 97   |       |
| <b>One / more persons of the above have been in an intensive care unit in connection with the COVID-19 disease</b>                    |      |      |     |      |     |      |      |       |
| Yes                                                                                                                                   | 566  | 93.2 | 21  | 3.5  | 20  | 3.3  | 607  | 100.0 |
| No                                                                                                                                    | 3386 | 91.5 | 136 | 3.7  | 179 | 4.8  | 3701 | 100.0 |
| I do not know                                                                                                                         | 88   | 93.6 | 4   | 4.3  | 2   | 2.1  | 94   | 100.0 |
| Missing / no answer                                                                                                                   |      |      |     |      |     |      | 98   |       |
| <b>One / more persons of the above have died in connection with COVID-19 disease</b>                                                  |      |      |     |      |     |      |      |       |
| Yes                                                                                                                                   | 456  | 93.8 | 14  | 2.9  | 16  | 3.3  | 486  | 100.0 |
| No                                                                                                                                    | 3550 | 91.5 | 145 | 3.7  | 184 | 4.7  | 3879 | 100.0 |
| I do not know                                                                                                                         | 32   | 97.0 | 0   | 0.0  | 1   | 3.0  | 33   | 100.0 |
| Missing / no answer                                                                                                                   |      |      |     |      |     |      | 102  |       |
| <b>In my personal environment (family, friends, colleagues) there are people for whom a COVID-19 disease would probably be severe</b> |      |      |     |      |     |      |      |       |
| Yes                                                                                                                                   | 3056 | 95.6 | 87  | 2.7  | 54  | 1.7  | 3197 | 100.0 |
| No                                                                                                                                    | 538  | 82.1 | 31  | 4.7  | 86  | 13.1 | 655  | 100.0 |
| I do not know                                                                                                                         | 515  | 82.1 | 49  | 7.8  | 63  | 10.0 | 627  | 100.0 |
| Missing / no answer                                                                                                                   |      |      |     |      |     |      | 21   |       |
| <b>In case of COVID-19 disease, I fear a severe course of the disease for myself</b>                                                  |      |      |     |      |     |      |      |       |
| Totally disagree                                                                                                                      | 444  | 74.4 | 30  | 5.0  | 123 | 20.6 | 597  | 100.0 |
| Rather disagree                                                                                                                       | 1922 | 93.3 | 86  | 4.2  | 53  | 2.6  | 2061 | 100.0 |
| Neither agree nor disagree                                                                                                            | 832  | 94.0 | 28  | 3.2  | 25  | 2.8  | 885  | 100.0 |
| Rather agree                                                                                                                          | 651  | 96.9 | 17  | 2.5  | 4   | 0.6  | 672  | 100.0 |
| Totally agree                                                                                                                         | 260  | 96.7 | 6   | 2.2  | 3   | 1.1  | 269  | 100.0 |
| Missing / no answer                                                                                                                   |      |      |     |      |     |      | 16   |       |
| <b>I am afraid of getting infected with COVID-19 in my professional environment.</b>                                                  |      |      |     |      |     |      |      |       |
| Totally disagree                                                                                                                      | 203  | 60.8 | 23  | 6.9  | 108 | 32.3 | 334  | 100.0 |
| Rather disagree                                                                                                                       | 1000 | 89.5 | 62  | 5.6  | 55  | 4.9  | 1117 | 100.0 |
| Neither agree nor disagree                                                                                                            | 654  | 93.2 | 27  | 3.8  | 21  | 3.0  | 702  | 100.0 |
| Rather agree                                                                                                                          | 1445 | 96.2 | 41  | 2.7  | 16  | 1.1  | 1502 | 100.0 |
| Totally agree                                                                                                                         | 784  | 97.4 | 14  | 1.7  | 7   | 0.9  | 805  | 100.0 |
| Missing / no answer                                                                                                                   |      |      |     |      |     |      | 40   |       |
| <b>I am afraid of becoming infected with COVID-19 in a private environment.</b>                                                       |      |      |     |      |     |      |      |       |
| Totally disagree                                                                                                                      | 334  | 69.0 | 27  | 5.6  | 123 | 25.4 | 484  | 100.0 |
| Rather disagree                                                                                                                       | 1594 | 91.6 | 88  | 5.1  | 59  | 3.4  | 1741 | 100.0 |
| Neither agree nor disagree                                                                                                            | 832  | 94.9 | 29  | 3.3  | 16  | 1.8  | 877  | 100.0 |
| Rather agree                                                                                                                          | 1093 | 97.8 | 19  | 1.7  | 6   | 0.5  | 1118 | 100.0 |
| Totally agree                                                                                                                         | 262  | 97.4 | 4   | 1.5  | 3   | 1.1  | 269  | 100.0 |
| N-Miss                                                                                                                                |      |      |     |      |     |      | 11   |       |
| <b>I feel well informed about COVID-19 vaccines.</b>                                                                                  |      |      |     |      |     |      |      |       |
| Totally disagree                                                                                                                      | 37   | 32.5 | 14  | 12.3 | 63  | 55.3 | 114  | 100.0 |

|                            |      |      |    |      |    |      |      |       |
|----------------------------|------|------|----|------|----|------|------|-------|
| Rather disagree            | 187  | 65.8 | 61 | 21.5 | 36 | 12.7 | 284  | 100.0 |
| Neither agree nor disagree | 380  | 85.4 | 36 | 8.1  | 29 | 6.5  | 445  | 100.0 |
| Rather agree               | 1770 | 95.2 | 43 | 2.3  | 46 | 2.5  | 1859 | 100.0 |
| Totally agree              | 1744 | 97.4 | 13 | 0.7  | 33 | 1.8  | 1790 | 100.0 |
| Missing / no answer        |      |      |    |      |    |      | 8    |       |

#### **I am afraid of short-term adverse effects of COVID-19 vaccines.**

|                            |      |      |    |      |    |      |      |       |
|----------------------------|------|------|----|------|----|------|------|-------|
| Totally disagree           | 1558 | 95.9 | 29 | 1.8  | 37 | 2.3  | 1624 | 100.0 |
| Rather disagree            | 1659 | 94.6 | 51 | 2.9  | 43 | 2.5  | 1753 | 100.0 |
| Neither agree nor disagree | 461  | 89.7 | 23 | 4.5  | 30 | 5.8  | 514  | 100.0 |
| Rather agree               | 353  | 80.0 | 48 | 10.9 | 40 | 9.1  | 441  | 100.0 |
| Totally agree              | 84   | 54.2 | 16 | 10.3 | 55 | 35.5 | 155  | 100.0 |
| Missing / no answer        |      |      |    |      |    |      | 13   |       |

#### **I am afraid of long-term adverse effects of COVID-19 vaccines.**

|                            |      |      |    |      |     |      |      |       |
|----------------------------|------|------|----|------|-----|------|------|-------|
| Totally disagree           | 1451 | 99.0 | 4  | 0.3  | 11  | 0.8  | 1466 | 100.0 |
| Rather disagree            | 1584 | 98.8 | 16 | 1.0  | 4   | 0.2  | 1604 | 100.0 |
| Neither agree nor disagree | 519  | 93.9 | 18 | 3.3  | 16  | 2.9  | 553  | 100.0 |
| Rather agree               | 434  | 78.8 | 66 | 12.0 | 51  | 9.3  | 551  | 100.0 |
| Totally agree              | 127  | 40.7 | 62 | 19.9 | 123 | 39.4 | 312  | 100.0 |
| Missing / no answer        |      |      |    |      |     |      | 14   |       |

#### **I believe the COVID-19 vaccines are effective.**

|                            |      |      |    |      |    |      |      |       |
|----------------------------|------|------|----|------|----|------|------|-------|
| Totally disagree           | 22   | 22.2 | 4  | 4.0  | 73 | 73.7 | 99   | 100.0 |
| Rather disagree            | 29   | 28.4 | 16 | 15.7 | 57 | 55.9 | 102  | 100.0 |
| Neither agree nor disagree | 180  | 58.1 | 82 | 26.5 | 48 | 15.5 | 310  | 100.0 |
| Rather agree               | 1656 | 96.2 | 47 | 2.7  | 18 | 1.0  | 1721 | 100.0 |
| Totally agree              | 2216 | 98.9 | 16 | 0.7  | 8  | 0.4  | 2240 | 100.0 |
| Missing / no answer        |      |      |    |      |    |      | 28   |       |

#### **I am concerned about what I consider novel mechanisms of action in COVID-19 vaccines.**

|                            |      |      |    |      |     |      |      |       |
|----------------------------|------|------|----|------|-----|------|------|-------|
| Totally disagree           | 1782 | 98.8 | 7  | 0.4  | 15  | 0.8  | 1804 | 100.0 |
| Rather disagree            | 1540 | 97.5 | 29 | 1.8  | 10  | 0.6  | 1579 | 100.0 |
| Neither agree nor disagree | 437  | 86.0 | 42 | 8.3  | 29  | 5.7  | 508  | 100.0 |
| Rather agree               | 269  | 71.0 | 61 | 16.1 | 49  | 12.9 | 379  | 100.0 |
| Totally agree              | 78   | 38.0 | 25 | 12.2 | 102 | 49.8 | 205  | 100.0 |
| Missing / no answer        |      |      |    |      |     |      | 25   |       |

#### **The development and approval of COVID-19 vaccines are moving too fast for me.**

|                            |      |      |    |      |     |      |      |       |
|----------------------------|------|------|----|------|-----|------|------|-------|
| Totally disagree           | 1792 | 99.4 | 5  | 0.3  | 6   | 0.3  | 1803 | 100.0 |
| Rather disagree            | 1403 | 98.6 | 14 | 1.0  | 6   | 0.4  | 1423 | 100.0 |
| Neither agree nor disagree | 519  | 92.2 | 35 | 6.2  | 9   | 1.6  | 563  | 100.0 |
| Rather agree               | 288  | 74.8 | 64 | 16.6 | 33  | 8.6  | 385  | 100.0 |
| Totally agree              | 108  | 34.8 | 49 | 15.8 | 153 | 49.4 | 310  | 100.0 |
| Missing / no answer        |      |      |    |      |     |      | 16   |       |

#### **I generally trust the COVID-19 vaccines.**

|                  |     |      |    |      |     |      |     |       |
|------------------|-----|------|----|------|-----|------|-----|-------|
| Totally disagree | 46  | 27.7 | 11 | 6.6  | 109 | 65.7 | 166 | 100.0 |
| Rather disagree  | 114 | 49.1 | 54 | 23.3 | 64  | 27.6 | 232 | 100.0 |

|                                                                                                                        |      |      |    |      |     |      |      |       |
|------------------------------------------------------------------------------------------------------------------------|------|------|----|------|-----|------|------|-------|
| Neither agree nor disagree                                                                                             | 358  | 79.7 | 70 | 15.6 | 21  | 4.7  | 449  | 100.0 |
| Rather agree                                                                                                           | 1830 | 98.3 | 24 | 1.3  | 7   | 0.4  | 1861 | 100.0 |
| Totally agree                                                                                                          | 1767 | 99.4 | 6  | 0.3  | 5   | 0.3  | 1778 | 100.0 |
| Missing / no answer                                                                                                    |      |      |    |      |     |      | 14   |       |
| <b>I believe that the pharmaceutical industry cares more about its profit motives than safety of COVID-19 vaccines</b> |      |      |    |      |     |      |      |       |
| Totally disagree                                                                                                       | 1020 | 98.3 | 8  | 0.8  | 10  | 1.0  | 1038 | 100.0 |
| Rather disagree                                                                                                        | 1758 | 96.8 | 38 | 2.1  | 20  | 1.1  | 1816 | 100.0 |
| Neither agree nor disagree                                                                                             | 911  | 92.1 | 50 | 5.1  | 28  | 2.8  | 989  | 100.0 |
| Rather agree                                                                                                           | 320  | 78.6 | 41 | 10.1 | 46  | 11.3 | 407  | 100.0 |
| Totally agree                                                                                                          | 75   | 37.1 | 27 | 13.4 | 100 | 49.5 | 202  | 100.0 |
| Missing / no answer                                                                                                    |      |      |    |      |     |      | 48   |       |
| <b>I trust the European regulatory authorities of COVID-19 vaccines used in Germany.</b>                               |      |      |    |      |     |      |      |       |
| Totally disagree                                                                                                       | 38   | 30.9 | 6  | 4.9  | 79  | 64.2 | 123  | 100.0 |
| Rather disagree                                                                                                        | 103  | 51.8 | 35 | 17.6 | 61  | 30.7 | 199  | 100.0 |
| Neither agree nor disagree                                                                                             | 299  | 74.2 | 65 | 16.1 | 39  | 9.7  | 403  | 100.0 |
| Rather agree                                                                                                           | 1806 | 96.1 | 51 | 2.7  | 22  | 1.2  | 1879 | 100.0 |
| Totally agree                                                                                                          | 1872 | 99.4 | 8  | 0.4  | 4   | 0.2  | 1884 | 100.0 |
| Missing / no answer                                                                                                    |      |      |    |      |     |      | 12   |       |
| <b>I generally trust in German health care politics</b>                                                                |      |      |    |      |     |      |      |       |
| Totally disagree                                                                                                       | 130  | 57.3 | 19 | 8.4  | 78  | 34.4 | 227  | 100.0 |
| Rather disagree                                                                                                        | 426  | 79.6 | 49 | 9.2  | 60  | 11.2 | 535  | 100.0 |
| Neither agree nor disagree                                                                                             | 888  | 91.5 | 44 | 4.5  | 38  | 3.9  | 970  | 100.0 |
| Rather agree                                                                                                           | 1835 | 96.3 | 45 | 2.4  | 26  | 1.4  | 1906 | 100.0 |
| Totally agree                                                                                                          | 826  | 98.3 | 8  | 1.0  | 6   | 0.7  | 840  | 100.0 |
| Missing / no answer                                                                                                    |      |      |    |      |     |      | 22   |       |
| <b>I generally trust in the medical opinion of physicians</b>                                                          |      |      |    |      |     |      |      |       |
| Totally disagree                                                                                                       | 15   | 46.9 | 1  | 3.1  | 16  | 50.0 | 32   | 100.0 |
| Rather disagree                                                                                                        | 98   | 74.2 | 12 | 9.1  | 22  | 16.7 | 132  | 100.0 |
| Neither agree nor disagree                                                                                             | 480  | 83.0 | 38 | 6.6  | 60  | 10.4 | 578  | 100.0 |
| Rather agree                                                                                                           | 2078 | 92.4 | 88 | 3.9  | 83  | 3.7  | 2249 | 100.0 |
| Totally agree                                                                                                          | 1438 | 96.4 | 27 | 1.8  | 26  | 1.7  | 1491 | 100.0 |
| Missing / no answer                                                                                                    |      |      |    |      |     |      | 18   |       |
| <b>Number of correct answers in knowledge test</b>                                                                     |      |      |    |      |     |      |      |       |
| 0                                                                                                                      | 63   | 67.0 | 12 | 12.8 | 19  | 20.2 | 94   | 100.0 |
| 1                                                                                                                      | 117  | 73.6 | 18 | 11.3 | 24  | 15.1 | 159  | 100.0 |
| 2                                                                                                                      | 485  | 86.5 | 29 | 5.2  | 47  | 8.4  | 561  | 100.0 |
| 3                                                                                                                      | 1100 | 92.2 | 51 | 4.3  | 42  | 3.5  | 1193 | 100.0 |
| 4                                                                                                                      | 2160 | 97.1 | 33 | 1.5  | 31  | 1.4  | 2224 | 100.0 |
| Missing / no answer                                                                                                    |      |      |    |      |     |      | 269  |       |
| <b>My primary care physician has given me ...</b>                                                                      |      |      |    |      |     |      |      |       |
| advise to get vaccinated against COVID-19                                                                              | 500  | 96.5 | 8  | 1.5  | 10  | 1.9  | 518  | 100.0 |
| advise not to get vaccinated against COVID-19                                                                          | 11   | 26.8 | 7  | 17.1 | 23  | 56.1 | 41   | 100.0 |
| We have not discussed the vaccination so far                                                                           | 2019 | 90.9 | 98 | 4.4  | 103 | 4.6  | 2220 | 100.0 |

|                                                                                                                           |      |      |     |      |     |      |      |       |
|---------------------------------------------------------------------------------------------------------------------------|------|------|-----|------|-----|------|------|-------|
| We have addressed the vaccination; my primary care physician has not made a recommendation for or against the vaccination | 54   | 72.0 | 12  | 16.0 | 9   | 12.0 | 75   | 100.0 |
| Missing / no answer                                                                                                       |      |      |     |      |     |      | 1646 |       |
| <b>The majority of my colleagues have / would like to ...</b>                                                             |      |      |     |      |     |      |      |       |
| get vaccinated against COVID-19                                                                                           | 3486 | 96.8 | 62  | 1.7  | 54  | 1.5  | 3602 | 100.0 |
| not get vaccinated against COVID-19                                                                                       | 67   | 38.7 | 15  | 8.7  | 91  | 52.6 | 173  | 100.0 |
| not yet decided whether to get vaccinated                                                                                 | 293  | 74.6 | 68  | 17.3 | 32  | 8.1  | 393  | 100.0 |
| we have not discussed vaccination so far                                                                                  | 125  | 81.2 | 13  | 8.4  | 16  | 10.4 | 154  | 100.0 |
| Missing / no answer                                                                                                       |      |      |     |      |     |      | 178  |       |
| <b>The majority of my family / friends have or would like to ...</b>                                                      |      |      |     |      |     |      |      |       |
| get vaccinated against COVID-19                                                                                           | 3623 | 98.4 | 40  | 1.1  | 19  | 0.5  | 3682 | 100.0 |
| not get vaccinated against COVID-19                                                                                       | 68   | 27.1 | 31  | 12.4 | 152 | 60.6 | 251  | 100.0 |
| not yet decided whether to get vaccinated                                                                                 | 349  | 75.1 | 88  | 18.9 | 28  | 6.0  | 465  | 100.0 |
| we have not discussed vaccination so far                                                                                  | 57   | 85.1 | 5   | 7.5  | 5   | 7.5  | 67   | 100.0 |
| Missing / no answer                                                                                                       |      |      |     |      |     |      | 35   |       |
| <b>From what media do you get your information in COVID-19 vaccination?</b>                                               |      |      |     |      |     |      |      |       |
| <b>Daily newspapers, weekly magazines (print)</b>                                                                         |      |      |     |      |     |      |      |       |
| Not selected                                                                                                              | 2984 | 91.2 | 121 | 3.7  | 168 | 5.1  | 3273 | 100.0 |
| Selected                                                                                                                  | 1141 | 93.0 | 46  | 3.7  | 40  | 3.3  | 1227 | 100.0 |
| <b>Daily newspapers, weekly magazines (online)</b>                                                                        |      |      |     |      |     |      |      |       |
| Not selected                                                                                                              | 1731 | 88.9 | 89  | 4.6  | 127 | 6.5  | 1947 | 100.0 |
| Selected                                                                                                                  | 2394 | 93.8 | 78  | 3.1  | 81  | 3.2  | 2553 | 100.0 |
| <b>Scientific journals (print)</b>                                                                                        |      |      |     |      |     |      |      |       |
| Not selected                                                                                                              | 3357 | 91.8 | 138 | 3.8  | 161 | 4.4  | 3656 | 100.0 |
| Selected                                                                                                                  | 768  | 91.0 | 29  | 3.4  | 47  | 5.6  | 844  | 100.0 |
| <b>Scientific journals (online)</b>                                                                                       |      |      |     |      |     |      |      |       |
| Not selected                                                                                                              | 1664 | 91.3 | 78  | 4.3  | 81  | 4.4  | 1823 | 100.0 |
| Selected                                                                                                                  | 2461 | 91.9 | 89  | 3.3  | 127 | 4.7  | 2677 | 100.0 |
| <b>Television / radio</b>                                                                                                 |      |      |     |      |     |      |      |       |
| Not selected                                                                                                              | 1618 | 89.0 | 69  | 3.8  | 130 | 7.2  | 1817 | 100.0 |
| Selected                                                                                                                  | 2507 | 93.4 | 98  | 3.7  | 78  | 2.9  | 2683 | 100.0 |
| <b>Social networks (e.g., Facebook)</b>                                                                                   |      |      |     |      |     |      |      |       |
| Not selected                                                                                                              | 3511 | 92.0 | 135 | 3.5  | 170 | 4.5  | 3816 | 100.0 |
| Selected                                                                                                                  | 614  | 89.8 | 32  | 4.7  | 38  | 5.6  | 684  | 100.0 |
| <b>Messenger services (e.g., Twitter, Telegram)</b>                                                                       |      |      |     |      |     |      |      |       |
| Not selected                                                                                                              | 3943 | 92.4 | 155 | 3.6  | 169 | 4.0  | 4267 | 100.0 |
| Selected                                                                                                                  | 182  | 78.1 | 12  | 5.2  | 39  | 16.7 | 233  | 100.0 |

| Online video platforms (e.g., YouTube)                                           |      |      |     |     |     |      |      |       |
|----------------------------------------------------------------------------------|------|------|-----|-----|-----|------|------|-------|
| Not selected                                                                     | 3624 | 92.7 | 142 | 3.6 | 144 | 3.7  | 3910 | 100.0 |
| Selected                                                                         | 501  | 84.9 | 25  | 4.2 | 64  | 10.8 | 590  | 100.0 |
| Websites / information portals of government health authorities (e.g., RKI, WHO) |      |      |     |     |     |      |      |       |
| Not selected                                                                     | 989  | 87.9 | 56  | 5.0 | 80  | 7.1  | 1125 | 100.0 |
| Selected                                                                         | 3136 | 92.9 | 111 | 3.3 | 128 | 3.8  | 3375 | 100.0 |
| Other                                                                            |      |      |     |     |     |      |      |       |
| Not selected                                                                     | 3732 | 91.7 | 158 | 3.9 | 179 | 4.4  | 4069 | 100.0 |
| Selected                                                                         | 393  | 91.2 | 9   | 2.1 | 29  | 6.7  | 431  | 100.0 |



Supplemental Table S6: Attitudes and experiences with vaccinations, Odds ratios with corresponding 95% confidence intervals. Large values indicate higher odds for willingness to vaccinate. If not stated otherwise “neither agree nor disagree” was used as reference.

| <b>Predictor</b>                                                                                                   | <b>Odds ratio</b> | <b>95% confidence interval</b> |              |
|--------------------------------------------------------------------------------------------------------------------|-------------------|--------------------------------|--------------|
|                                                                                                                    |                   | <b>Lower</b>                   | <b>Upper</b> |
| <b>I trust the regulatory authorities of vaccines in Germany in general.</b>                                       |                   |                                |              |
| Totally disagree                                                                                                   | 0.42              | 0.25                           | 0.70         |
| Rather disagree                                                                                                    | 0.37              | 0.24                           | 0.58         |
| Rather agree                                                                                                       | 5.64              | 4.13                           | 7.70         |
| Totally agree                                                                                                      | 47.15             | 29.76                          | 74.72        |
| <b>I trust the European regulatory authorities of COVID-19 vaccines used in Germany.</b>                           |                   |                                |              |
| Totally disagree                                                                                                   | 0.16              | 0.10                           | 0.24         |
| Rather disagree                                                                                                    | 0.37              | 0.26                           | 0.53         |
| Rather agree                                                                                                       | 8.61              | 6.23                           | 11.89        |
| Totally agree                                                                                                      | 54.26             | 29.49                          | 99.85        |
| <b>I basically trust in the German health care politics.</b>                                                       |                   |                                |              |
| Totally disagree                                                                                                   | 0.12              | 0.09                           | 0.18         |
| Rather disagree                                                                                                    | 0.36              | 0.26                           | 0.49         |
| Rather agree                                                                                                       | 2.39              | 1.72                           | 3.31         |
| Totally agree                                                                                                      | 5.45              | 3.07                           | 9.68         |
| <b>I generally trust in the medical opinion of physicians.</b>                                                     |                   |                                |              |
| Totally disagree                                                                                                   | 0.18              | 0.09                           | 0.37         |
| Rather disagree                                                                                                    | 0.59              | 0.38                           | 0.92         |
| Rather agree                                                                                                       | 2.48              | 1.90                           | 3.24         |
| Totally agree                                                                                                      | 5.54              | 3.90                           | 7.86         |
| <b>I already had a serious vaccine adverse effect that required medical treatment. (Ref: No)</b>                   |                   |                                |              |
| Yes                                                                                                                | 0.29              | 0.19                           | 0.44         |
| <b>I make sure to keep my vaccinations up to date.</b>                                                             |                   |                                |              |
| Totally disagree                                                                                                   | 0.10              | 0.05                           | 0.21         |
| Rather disagree                                                                                                    | 0.66              | 0.38                           | 1.16         |
| Rather agree                                                                                                       | 1.97              | 1.22                           | 3.16         |
| Totally agree                                                                                                      | 4.57              | 2.87                           | 7.29         |
| <b>I receive flu (influenza) vaccinations regularly.</b>                                                           |                   |                                |              |
| Totally disagree                                                                                                   | 0.25              | 0.16                           | 0.40         |
| Rather disagree                                                                                                    | 0.86              | 0.50                           | 1.47         |
| Rather agree                                                                                                       | 1.92              | 1.10                           | 3.37         |
| Totally agree                                                                                                      | 3.39              | 2.00                           | 5.73         |
| <b>I feel well informed about COVID-19 vaccines.</b>                                                               |                   |                                |              |
| Totally disagree                                                                                                   | 0.08              | 0.05                           | 0.13         |
| Rather disagree                                                                                                    | 0.33              | 0.23                           | 0.47         |
| Rather agree                                                                                                       | 3.40              | 2.43                           | 4.77         |
| Totally agree                                                                                                      | 6.49              | 4.38                           | 9.61         |
| <b>I believe the COVID-19 vaccines are effective.</b>                                                              |                   |                                |              |
| Totally disagree                                                                                                   | 0.21              | 0.12                           | 0.35         |
| Rather disagree                                                                                                    | 0.29              | 0.18                           | 0.47         |
| Rather agree                                                                                                       | 18.40             | 13.16                          | 25.73        |
| Totally agree                                                                                                      | 66.69             | 42.05                          | 105.76       |
| <b>I generally trust COVID-19 vaccines.</b>                                                                        |                   |                                |              |
| Totally disagree                                                                                                   | 0.10              | 0.06                           | 0.15         |
| Rather disagree                                                                                                    | 0.25              | 0.17                           | 0.35         |
| Rather agree                                                                                                       | 15.01             | 9.83                           | 22.91        |
| Totally agree                                                                                                      | 40.83             | 21.62                          | 77.12        |
| <b>I believe the pharmaceutical industry cares more about its profit motives than safety of COVID-19 vaccines.</b> |                   |                                |              |
| Totally disagree                                                                                                   | 4.85              | 2.88                           | 8.16         |
| Rather disagree                                                                                                    | 2.60              | 1.83                           | 3.68         |
| Rather agree                                                                                                       | 0.31              | 0.23                           | 0.44         |

|                                                                                               |       |       |       |
|-----------------------------------------------------------------------------------------------|-------|-------|-------|
| Totally agree                                                                                 | 0.05  | 0.04  | 0.07  |
| I am afraid of short-term adverse effects of COVID-19 vaccines.                               |       |       |       |
| Totally disagree                                                                              | 2.71  | 1.86  | 3.95  |
| Rather disagree                                                                               | 2.03  | 1.43  | 2.89  |
| Rather agree                                                                                  | 0.46  | 0.32  | 0.67  |
| Totally agree                                                                                 | 0.14  | 0.09  | 0.21  |
| I am afraid of long-term adverse effects from COVID-19 vaccines.                              |       |       |       |
| Totally disagree                                                                              | 6.34  | 3.42  | 11.73 |
| Rather disagree                                                                               | 5.19  | 2.96  | 9.09  |
| Rather agree                                                                                  | 0.24  | 0.16  | 0.36  |
| Totally agree                                                                                 | 0.04  | 0.03  | 0.07  |
| I am concerned about what I consider novel mechanisms of action in COVID-19 vaccines.         |       |       |       |
| Totally disagree                                                                              | 13.16 | 8.07  | 21.47 |
| Rather disagree                                                                               | 6.42  | 4.28  | 9.62  |
| Rather agree                                                                                  | 0.40  | 0.28  | 0.56  |
| Totally agree                                                                                 | 0.10  | 0.07  | 0.15  |
| The development and approval of COVID-19 vaccines are moving too fast for me.                 |       |       |       |
| Totally disagree                                                                              | 13.81 | 7.08  | 26.93 |
| Rather disagree                                                                               | 5.95  | 3.47  | 10.19 |
| Rather agree                                                                                  | 0.25  | 0.17  | 0.37  |
| Totally agree                                                                                 | 0.05  | 0.03  | 0.07  |
| I feel well informed about vaccines in general.                                               |       |       |       |
| Totally disagree                                                                              | 0.24  | 0.13  | 0.43  |
| Rather disagree                                                                               | 0.55  | 0.37  | 0.83  |
| Rather agree                                                                                  | 2.82  | 2.05  | 3.87  |
| Totally agree                                                                                 | 4.40  | 3.17  | 6.09  |
| I think vaccinations are generally effective                                                  |       |       |       |
| Totally disagree                                                                              | 3.10  | 1.43  | 6.74  |
| Rather disagree                                                                               | 0.61  | 0.28  | 1.35  |
| Rather agree                                                                                  | 6.05  | 3.64  | 10.06 |
| Totally agree                                                                                 | 34.21 | 20.91 | 55.98 |
| I trust vaccines in general.                                                                  |       |       |       |
| Totally disagree                                                                              | 0.27  | 0.14  | 0.52  |
| Rather disagree                                                                               | 0.36  | 0.21  | 0.62  |
| Rather agree                                                                                  | 4.54  | 3.14  | 6.57  |
| Totally agree                                                                                 | 21.02 | 14.25 | 31.01 |
| I am generally afraid of adverse effects of vaccinations.                                     |       |       |       |
| Totally disagree                                                                              | 6.57  | 4.57  | 9.44  |
| Rather disagree                                                                               | 4.03  | 2.87  | 5.64  |
| Rather agree                                                                                  | 0.82  | 0.56  | 1.20  |
| Totally agree                                                                                 | 0.41  | 0.27  | 0.62  |
| I believe that the pharmaceutical industry's puts profit motives over the safety of vaccines. |       |       |       |
| Totally disagree                                                                              | 3.04  | 1.98  | 4.65  |
| Rather disagree                                                                               | 3.38  | 2.37  | 4.82  |
| Rather agree                                                                                  | 0.37  | 0.27  | 0.50  |
| Totally agree                                                                                 | 0.09  | 0.07  | 0.13  |
